# Supplementary material for: Sequestration of chromium(vi) and nickel(ii) heavy metals from unhygienic water via sustainable and innovative magnetic nanotechnology
Source: Royal Society of Chemistry journal article supplement (doi:10.1039/d3na00923h), 2023-11-24
Supplement: d3na00923h1.pdf [file d3na00923h1.pdf]

**Table: Bio-adsorbents utilized for sequestrating heavy metals**

| Sr. # | Bio-adsorbent                                                                              | Metals removed                      | References                            |
|-------|--------------------------------------------------------------------------------------------|-------------------------------------|---------------------------------------|
| 1     | Nanoscale zero-valent iron/Nickel                                                          | Cr (VI)                             | (Zhu <i>et al.</i> , 2018)            |
| 2     | Iron/Carbon composite                                                                      | Cr (VI)                             | (Wu <i>et al.</i> , 2019)             |
| 3     | Date palm biochar                                                                          | Pb <sup>+2</sup> , Cu <sup>+2</sup> | (Amin <i>et al.</i> , 2019)           |
| 4     | Titanium dioxide/ Bacterial cellulose                                                      | Pb                                  | (Shoukat <i>et al.</i> , 2019)        |
| 5     | Activated Carbon                                                                           | Cr (VI)                             | (Valentín-Reyes <i>et al.</i> , 2019) |
| 6     | Lemon peel                                                                                 | Cu                                  | (Meseldzija <i>et al.</i> , 2019)     |
| 7     | Biogenic manganese oxide                                                                   | Sb (III)                            | (Wang <i>et al.</i> , 2019)           |
| 8     | Mango kernel                                                                               | Cr (VI)                             | (Rai <i>et al.</i> , 2016)            |
| 9     | Iron-oxide coated cellulose/ hydrotalcite, and Iron oxide coated cellulose/ Hydroxyapatite | Cr (VI)                             | (Periyasamy <i>et al.</i> , 2017)     |
| 10    | Nano-Zirconium oxide crosslinked nanolayer of carboxymethyl cellulose                      | Cr (III), Cr (VI)                   | (Mahmoud <i>et al.</i> , 2017)        |
| 11    | DiethyleneTriAminePentaAcetic acid (DTPA) modified cellulose                               | Hg (II)                             | (Li <i>et al.</i> , 2019)             |
| 12    | Sulfated carboxymethyl cellulose Nanofilter                                                | Cr (VI)                             | (Gasemloo <i>et al.</i> , 2019)       |
| 13    | Sodium carboxymethyl cellulose based Adsorbent                                             | Pb (II)                             | (Chen <i>et al.</i> , 2019)           |
| 14    | <i>SARGASSUM SP.</i>                                                                       | Ni (II), Cu (II)                    | (Barquilha <i>et al.</i> , 2019)      |
| 15    | Fe <sub>2</sub> O <sub>3</sub> Coated by SiO <sub>2</sub>                                  | Ni (II)                             | (Ahmad <i>et al.</i> , 2019)          |
| 16    | <i>Melia azedarach</i> wood                                                                | Cr (VI)                             | (Chojnacka and Mikulewicz, 2019)      |
| 17    | <i>Phragmites australis</i>                                                                | Cd, Pb, Ni                          | (Bello <i>et al.</i> , 2018)          |
| 18    | Modified coconut coir pith                                                                 | Cr (VI)                             | (Namasivayam and Sureshkumar, 2008)   |
| 19    | Silica based hybrid adsorbent                                                              | Ni (II)                             | (Xu <i>et al.</i> , 2016)             |
| 20    | Citrus Limettioides peel carbon, and Citrus Limettioides seed carbon                       | Ni (II)                             | (Sudha <i>et al.</i> , 2015)          |
| 21    | Pomegranate peel                                                                           | Ni (II)                             | (Bhatnagar <i>et al.</i> , 2010)      |
| 22    | Sugarcane bagass pitch                                                                     | Ni (II)                             | (Krishnan <i>et al.</i> , 2011)       |

|    |                                                                         |                                                                                                  |                                    |
|----|-------------------------------------------------------------------------|--------------------------------------------------------------------------------------------------|------------------------------------|
| 23 | Cucumber peel                                                           | Pb                                                                                               | (Basu <i>et al.</i> , 2017)        |
| 24 | Cauliflower leaves                                                      | Cu, Cr, Pb and Zn                                                                                | (Gupta and Chandra, 2018)          |
| 25 | <i>Musa paradisiaca</i> peels                                           | Pb, Cd                                                                                           | (Ibisi and Asoluka, 2018)          |
| 26 | <i>Pinus halepensis</i> sawdust                                         | Cu, Pb                                                                                           | (Semerjian, 2018)                  |
| 27 | Sulfurized wood biochar                                                 | Hg                                                                                               | (Park <i>et al.</i> , 2019)        |
| 28 | Modified Peanut Shell                                                   | Ni (II)                                                                                          | (An <i>et al.</i> , 2019)          |
| 29 | Fe <sub>3</sub> O <sub>4</sub> / <i>Raphia farinifera</i> nanocomposite | Pb                                                                                               | (Overah <i>et al.</i> , 2019)      |
| 30 | <i>Fucus spiralis</i>                                                   | Pb (II)                                                                                          | (Filote <i>et al.</i> , 2019)      |
| 31 | NaOH modified hickory wood                                              | Pb <sup>2+</sup> , Cd <sup>2+</sup> , Cu <sup>2+</sup> , Zn <sup>2+</sup> , and Ni <sup>2+</sup> | (Ding <i>et al.</i> , 2016)        |
| 32 | Zn- Sugarcane Bagasse nanocomposite                                     | Cr (VI)                                                                                          | (Gan <i>et al.</i> , 2015)         |
| 33 | Anaerobically Digested Sugarcane Bagasse                                | Pb                                                                                               | (Inyang <i>et al.</i> , 2011)      |
| 33 | Tea Waste Biochar                                                       | Fluoride                                                                                         | (Roy <i>et al.</i> , 2018)         |
| 34 | Cashew nut shell                                                        | Cd (II), Pb (II), and Cr (III)                                                                   | (Coelho <i>et al.</i> , 2014)      |
| 35 | Citrus maxima peel, passion fruit shell, and sugarcane bagasse          | Cu (II), Cd (II), Pb (II), Ni (II)                                                               | (Chao <i>et al.</i> , 2014)        |
| 36 | Lemon Peel                                                              | Co                                                                                               | (Bhatnagar <i>et al.</i> , 2010)   |
| 37 | Raw pomegranate peel                                                    | Cu                                                                                               | (Ben-Ali <i>et al.</i> , 2017)     |
| 38 | Tea Waste                                                               | Cu, Pb                                                                                           | (Amarasinghe and Williams, 2007)   |
| 39 | Tea Leaves                                                              | Pb, Fe, Zn, Ni                                                                                   | (Ahluwalia and Goyal, 2005)        |
| 40 | Coconut Shell                                                           | Cu (II)                                                                                          | (Acheampong <i>et al.</i> , 2013)  |
| 41 | Peanut Husk                                                             | Pb <sup>2+</sup> , Mn <sup>2+</sup> , Cd <sup>2+</sup> , Ni <sup>2+</sup> , Co <sup>2+</sup>     | (Abdelfattah <i>et al.</i> , 2016) |
| 42 | Sago Waste                                                              | Pb, Cu                                                                                           | (Quek <i>et al.</i> , 1998)        |
| 43 | <i>Mangifera indica</i>                                                 | Cu <sup>2+</sup> , Zn <sup>2+</sup>                                                              | (Nadeem <i>et al.</i> , 2015)      |
| 44 | Coconut Husk                                                            | Ar (III)                                                                                         | (Manju <i>et al.</i> , 1998)       |
| 45 | Modified Sugar beet pulp                                                | Th (I)                                                                                           | (Zolgharnein <i>et al.</i> , 2011) |
| 46 | Barley Straws                                                           | Cu, Pb                                                                                           | (Pehlivan <i>et al.</i> , 2009)    |
| 47 | Hazelnut and almond shell                                               | Pb                                                                                               | (Pehlivan <i>et al.</i> , 2009)    |
| 48 | Rogers mushroom biomass ' <i>Lepiota hystrix</i> '                      | Pb, Cu                                                                                           | (Kariuki <i>et al.</i> , 2017)     |
| 49 | <i>Ficus carica</i>                                                     | Cr (VI)                                                                                          | (Gupta <i>et al.</i> , 2013)       |
| 50 | Modified Orange peels                                                   | Pb <sup>2+</sup> , Cd <sup>2+</sup> , Ni <sup>2+</sup>                                           | (Feng <i>et al.</i> , 2011)        |

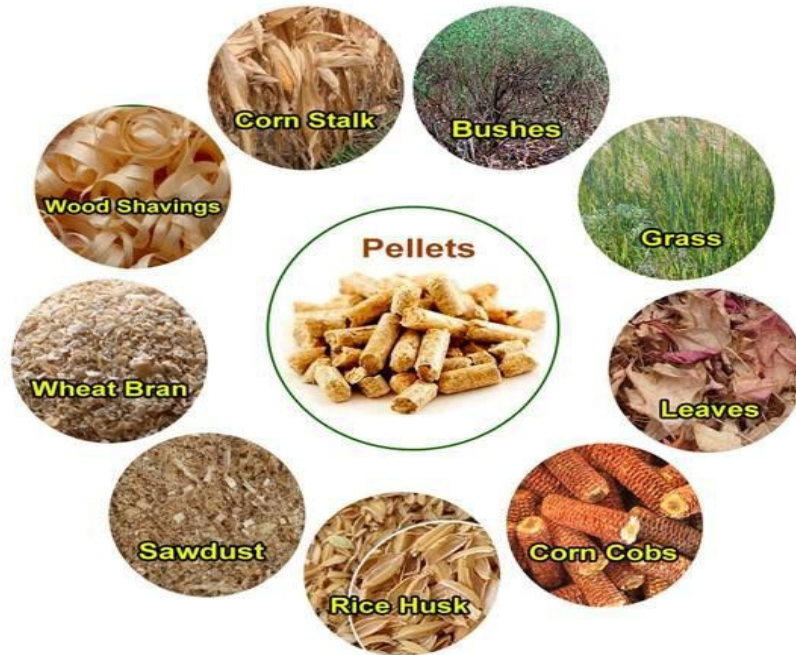

**Fig. Agricultural wastes for water treatment under consideration**
