# Supplementary material for: Sequestration of chromium(vi) and nickel(ii) heavy metals from unhygienic water via sustainable and innovative magnetic nanotechnology
Source: Royal Society of Chemistry journal article supplement (doi:10.1039/d3na00923h), 2023-11-24
Supplement: d3na00923h2.pdf [file d3na00923h2.pdf]

### Calibration curves for Ni (II) and Cr (IV)

Concentration and absorbance values of Ni and Cr are given in **Table 1** and **Table 2** respectively. Their graphical representation is shown in **Fig. 1.** and **Fig. 2.**

**Table 1. Calibration curve values for nickel**

| Concentration standards (ppm) | Absorbance |
|-------------------------------|------------|
| 0                             | 0.0005     |
| 1                             | 0.0557     |
| 5                             | 0.1896     |
| 10                            | 0.2455775  |
| 20                            | 0.580325   |
| 30                            | 0.915075   |
| 40                            | 1.249825   |
| 50                            | 1.584575   |
| 60                            | 1.919325   |
| 70                            | 2.254075   |
| 80                            | 2.588825   |
| 90                            | 2.923575   |
| 100                           | 3.235825   |

**Table 2. Calibration curve values for chromium**

| Concentration (ppm) | Absorbance |
|---------------------|------------|
| 0                   | 0.0005     |
| 1                   | 0.0095     |
| 5                   | 0.0304     |
| 10                  | 0.037525   |
| 20                  | 0.089775   |
| 30                  | 0.142025   |
| 40                  | 0.194275   |
| 50                  | 0.246525   |
| 60                  | 0.298775   |
| 70                  | 0.351025   |
| 80                  | 0.403275   |
| 90                  | 0.455      |
| 100                 | 0.501      |

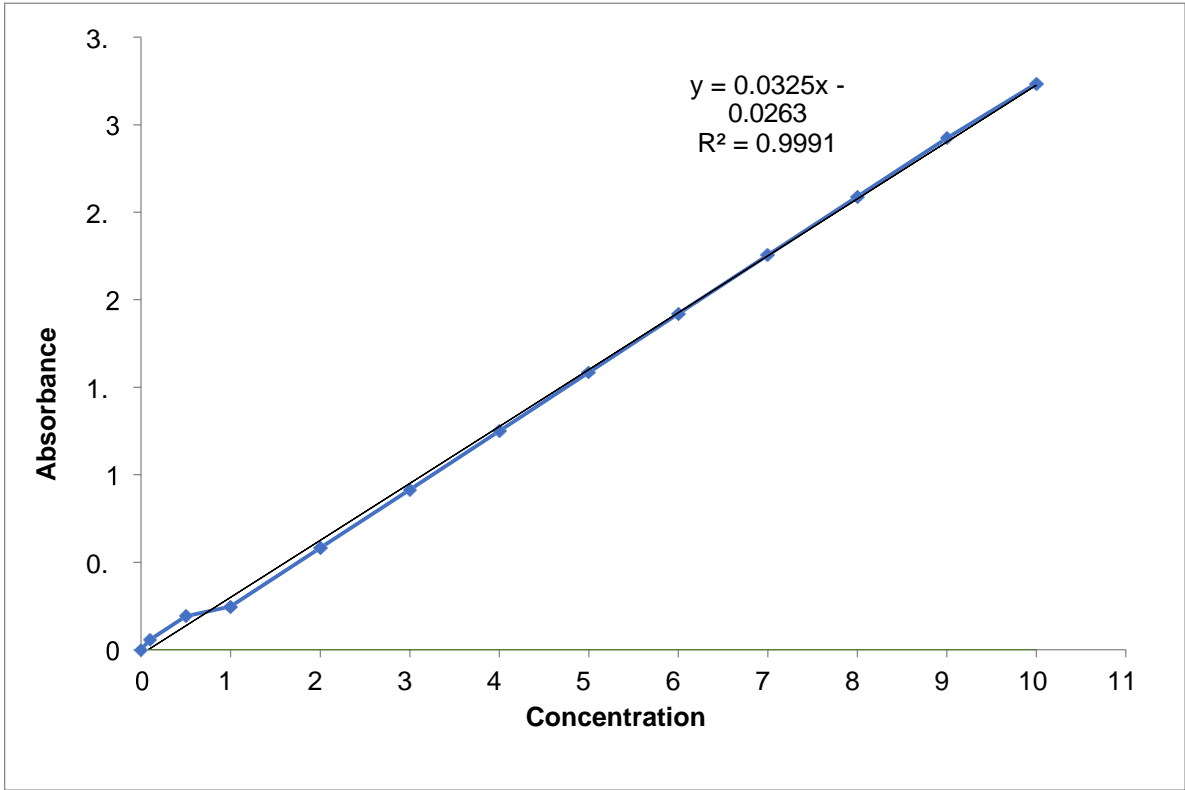

**Fig. 1. Standard curve of Ni**

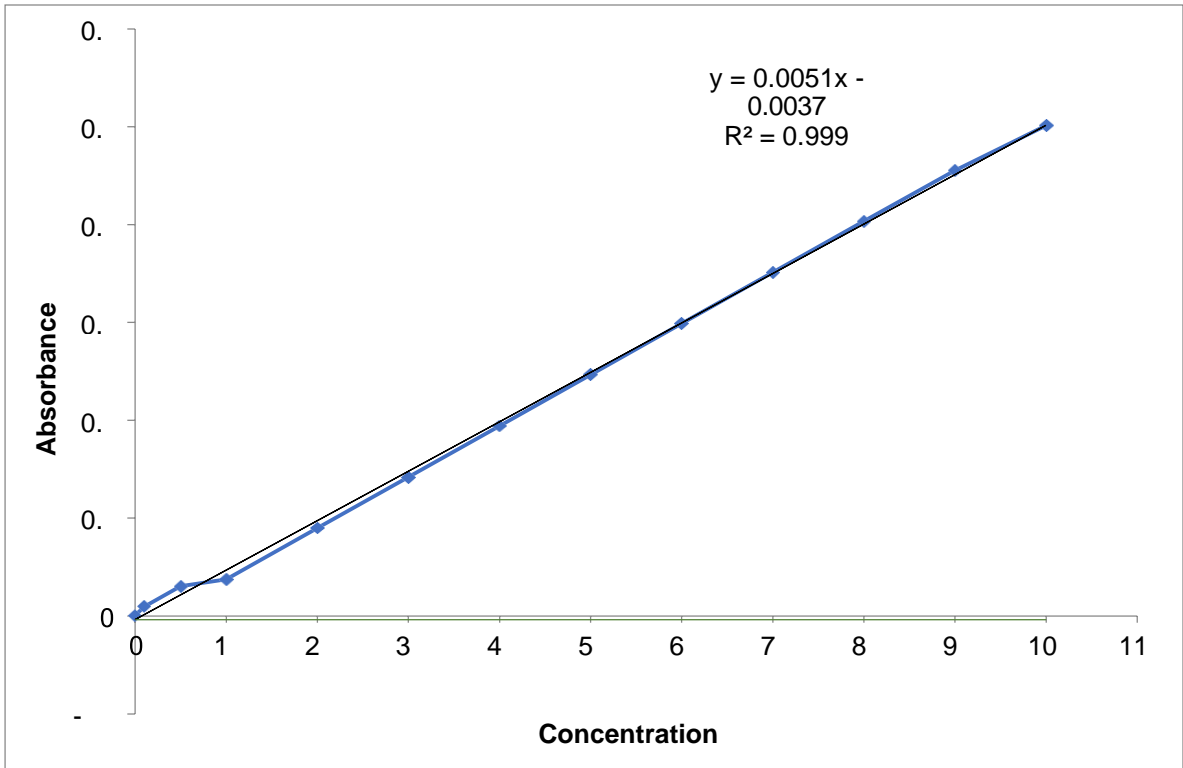

**Fig. 2. Standard Curve of Cr**
