# Supplementary material for: Sequestration of chromium(vi) and nickel(ii) heavy metals from unhygienic water via sustainable and innovative magnetic nanotechnology
Source: Royal Society of Chemistry journal article supplement (doi:10.1039/d3na00923h), 2023-11-24
Supplement: d3na00923h3.pdf [file d3na00923h3.pdf]

## Sequestration of chromium (VI) and nickel (II) heavy metals from unhygienic water via sustainable and innovative magnetic nanotechnology

In a world increasingly challenged by environmental degradation and water pollution, our research shines a light on a pioneering research endeavor. This transformative study delves into the sustainable fabrication of Magnetite ( $\text{Fe}_3\text{O}_4$ ) Nanocomposites, offering a groundbreaking solution for the effective remediation of toxic heavy metals from unhygienic water sources. Water pollution, primarily due to the presence of heavy metals, poses a grave threat to ecosystems and human health. Traditional methods of water purification often fall short in addressing this critical issue, requiring innovative and sustainable solutions. This spotlight statement showcases the dedicated efforts of researchers who have harnessed the power of nanotechnology to engineer Magnetite Nanocomposite that exhibit remarkable efficacy in heavy metal removal.

The sustainable fabrication of these nanocomposites underscores the commitment to eco-friendly practices, utilizing environmentally responsible materials and processes. By harnessing magnetite's unique properties, researchers have crafted a novel, cost-effective, and sustainable solution for water remediation, contributing to a cleaner and healthier environment. This research invites readers to explore the intricate details of this research, emphasizing its significance in advancing the field of environmental science and sustainable technology. It underscores the importance of innovation in addressing urgent global challenges and serves as an inspirational beacon for researchers, policymakers, and industries dedicated to preserving our planet's precious water resources.

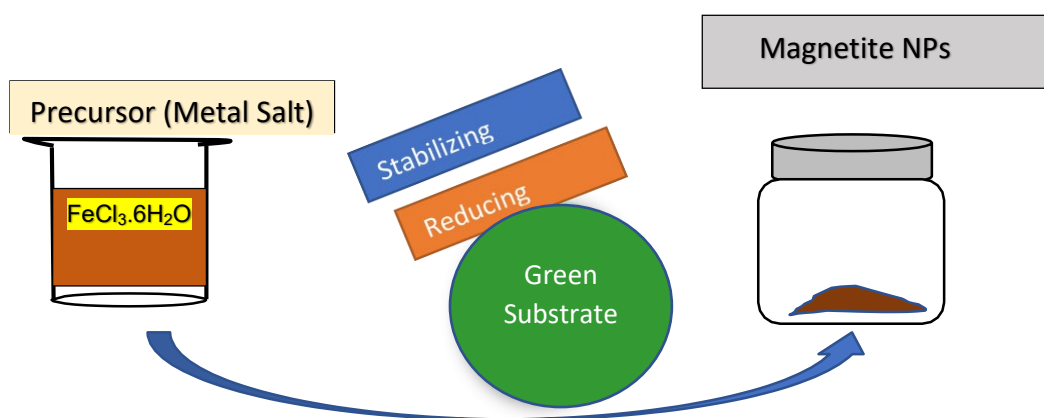

Noor Zulfiqar
